# Supplementary material for: Integrating chromatin conformation information in a self-supervised learning model improves metagenome binning
Source: PeerJ journal article supplement (doi:10.7717/peerj.16129), 2023-09-22
Supplement: Supplimental_Figures.pdf [file Supplimental_Figures.pdf]

## Figure S1

Hi-C sequencing library parameters

| Library | Organism                                               | Cell Numbers | Library Type | Kit                 | Kit Version |
|---------|--------------------------------------------------------|--------------|--------------|---------------------|-------------|
| GBBOG   | ZymoBIOMICS™ Microbial Community DNA Standard: D6305   | 100ng DNA    | Shotgun      | Kapa Hyper Prep Kit | N/A         |
| CZWOH   | ZymoBIOMICS™ Microbial Community Standard cells: D6300 | 1E8 cells    | Hi-C         | Phase Genomics      | 1           |
| CZWON   | ZymoBIOMICS™ Microbial Community Standard cells: D6300 | 2.8E8 cells  | Hi-C         | Arima/Kapa          | 1           |
| GPANX   | ZymoBIOMICS™ Microbial Community Standard cells: D6300 | 2.8E8 cells  | Hi-C         | Arima/Kapa          | 1           |
| GPANY   | ZymoBIOMICS™ Microbial Community Standard cells: D6300 | 1E8 cells    | Hi-C         | Phase Genomics      | 1.5         |
| GPANZ   | ZymoBIOMICS™ Microbial Community Standard cells: D6300 | 1E8 cells    | Hi-C         | Phase Genomics      | 1.5         |
| GPAOA   | ZymoBIOMICS™ Microbial Community Standard cells: D6300 | 1E8 cells    | Hi-C         | Phase Genomics      | 1.5         |
| GPAOB   | ZymoBIOMICS™ Microbial Community Standard cells: D6300 | 1E8 cells    | Hi-C         | Phase Genomics      | 1.5         |

## Figure S2

Commands-line options of tools used

### Quality and adapter filtering

```
bbduk.sh in=<wgs.fastq> out=<adapter_filtered_wgs_1.fastq>  
out2=<adapter_filtered_wgs_2.fastq> k=23 ktrim=r mink=12 hdist=1 minlength=50 tpe  
tbo
```

```
bbduk.sh in=<adapter_filtered_wgs_1.fastq> in2=$<adapter_filtered_wgs_2.fastq>  
out=<quality_filtered_wgs_1.fastq> out2=<quality_filtered_wgs_2.fastq> qtrim=rl  
trimq=10 minlength=50 chastityfilter=True
```

### Metagenome assembly and initial binning

```
metaspades.py -m 1500 -t 60 -1 <quality_filtered_wgs_1.fastq> -2  
<quality_filtered_wgs_2.fastq> -o <spades_output>
```

```
bbmap.sh in<quality_filtered_wgs_1.fastq> in2=<quality_filtered_wgs_2.fastq>  
ref=<scaffolds.fasta> out=<wgs_bbmaped.bam>
```

```
samtools sort <wgs_bbmaped.bam> -o <wgs_sorted_bbmaped.bam>
```

```
samtools index <wgs_sorted_bbmaped.bam>
```

```
runMetaBat.sh -m 1500 <scaffolds.fasta> <wgs_sorted_bbmaped.bam>
```

### Running MetaBAT-LR

```
Metabat_LR.sh -s <scaffolds.fasta> -1 <hic_1.fastq> -2 <hic_2.fastq> -b  
<input_bins_directory> -d <depth_file.txt> -t <threads> -o <output_directory>
```

### Running bin3C

```
bwa mem -5SP -t <threads> <contigs.fasta> <hic_1.fastq> <hic_2.fastq> | \  
samtools view -F 0x904 -bS - | \  
samtools sort -o <output_directory> -
```

```
samtools sort -n -o <mapped.bam> -
```

```
bin3C.py mkmap -e <enzyme1> -e <enzyme2> -v <contigs.fasta> <mapped.bam>  
<bin3c_out_directory>
```

```
bin3C.py cluster -v <contact_map.p.gz> <clust_out_directory>
```

### Running HicSPAdes

```
hicspades-binner <assembly_graph.gfa> <dataset_description.yaml>  
<output_directory>
```

### Running BinSPreader

```
bin-refine <assembly_graph.gfa> <initial_binning_file.tsv> <output directory>
```

### Running dRep

```
dRep dereplicate <output_directory> -p <threads> -d -l 200000 -sa 0.97 -comp 5 -con  
99 -g <genome_input_list.txt>
```

```
python3 amber.py -g <gold_standard.txt> <method1_bins_biobox.tsv>  
<method2_bins_biobox.tsv> <method3_bins_biobox.tsv> -o <amber_output>
```

## Figure S3

### Quast output data of Synthetic Dataset

Total Aligned Length of Synthetic Metagenome Bins Before MetaBAT-LR was Applied (in bp)

| Reference Genomes        | bin.1   | bin.10 | bin.11 | bin.12  | bin.13  | bin.14  | <u>bin.15</u> | bin.2   | bin.3   | bin.4   | bin.5   | bin.6  | bin.7  | bin.8   | bin.9  |
|--------------------------|---------|--------|--------|---------|---------|---------|---------------|---------|---------|---------|---------|--------|--------|---------|--------|
| Bacillus subtilis        | -       | -      | -      | -       | -       | -       | -             | -       | 1818749 | -       | 1135237 | -      | 890877 | -       | -      |
| Cryptococcus neoformans  | -       | -      | -      | -       | -       | -       | 1927          | -       | -       | -       | -       | -      | -      | -       | -      |
| Enterococcus faecalis    | -       | -      | -      | 1117655 | -       | -       | -             | -       | 74      | 1459877 | -       | -      | -      | -       | -      |
| Escherichia coli         | -       | -      | -      | -       | -       | 4538063 | -             | -       | -       | -       | -       | -      | -      | -       | -      |
| Lactobacillus fermentum  | -       | 266607 | 236079 | -       | -       | -       | -             | -       | -       | -       | -       | 497487 | -      | -       | 374862 |
| Listeria monocytogenes   | -       | -      | -      | -       | -       | -       | -             | -       | 74      | -       | -       | -      | -      | 2922858 | -      |
| Pseudomonas aeruginosa   | -       | -      | -      | -       | 6689753 | -       | -             | -       | -       | -       | -       | -      | -      | -       | -      |
| Saccharomyces cerevisiae | -       | -      | -      | -       | -       | -       | 4712838       | -       | -       | -       | -       | -      | -      | -       | -      |
| Salmonella enterica      | 3801292 | -      | -      | -       | -       | 814409  | -             | -       | -       | -       | -       | -      | -      | -       | -      |
| Staphylococcus aureus    | -       | -      | -      | -       | -       | -       | -             | 2636514 | 79      | -       | -       | -      | -      | -       | -      |

Total Aligned Length of Synthetic Metagenome Bins After MetaBAT-LR was Applied (in bp)

| Reference Genomes               | bin.1   | bin.10.11.9.6 | bin.12.4 | bin.13  | bin.14  | <u>bin.15</u> | bin.2   | bin.3.7.5 | bin.8   |
|---------------------------------|---------|---------------|----------|---------|---------|---------------|---------|-----------|---------|
| <i>Bacillus subtilis</i>        | -       | -             | -        | -       | -       | -             | -       | 3844863   | -       |
| <i>Cryptococcus neoformans</i>  | -       | -             | -        | -       | -       | 8840412       | -       | -         | -       |
| <i>Enterococcus faecalis</i>    | -       | -             | 2577532  | -       | -       | -             | -       | 74        | -       |
| <i>Escherichia coli</i>         | -       | -             | -        | -       | 4538063 | -             | -       | -         | -       |
| <i>Lactobacillus fermentum</i>  | -       | 1375035       | -        | -       | -       | -             | -       | -         | -       |
| <i>Listeria monocytogenes</i>   | -       | -             | -        | -       | -       | -             | -       | 74        | 2922858 |
| <i>Pseudomonas aeruginosa</i>   | -       | -             | -        | 6689753 | -       | -             | -       | -         | -       |
| <i>Saccharomyces cerevisiae</i> | -       | -             | -        | -       | -       | 9546496       | -       | -         | -       |
| <i>Salmonella enterica</i>      | 3801292 | -             | -        | -       | 814955  | -             | -       | -         | -       |
| <i>Staphylococcus aureus</i>    | -       | -             | -        | -       | -       | -             | 2636514 | 79        | -       |

Figure S4

Percent Genome Completeness in WGS with a Gradient Subsampling of Hi-C Data

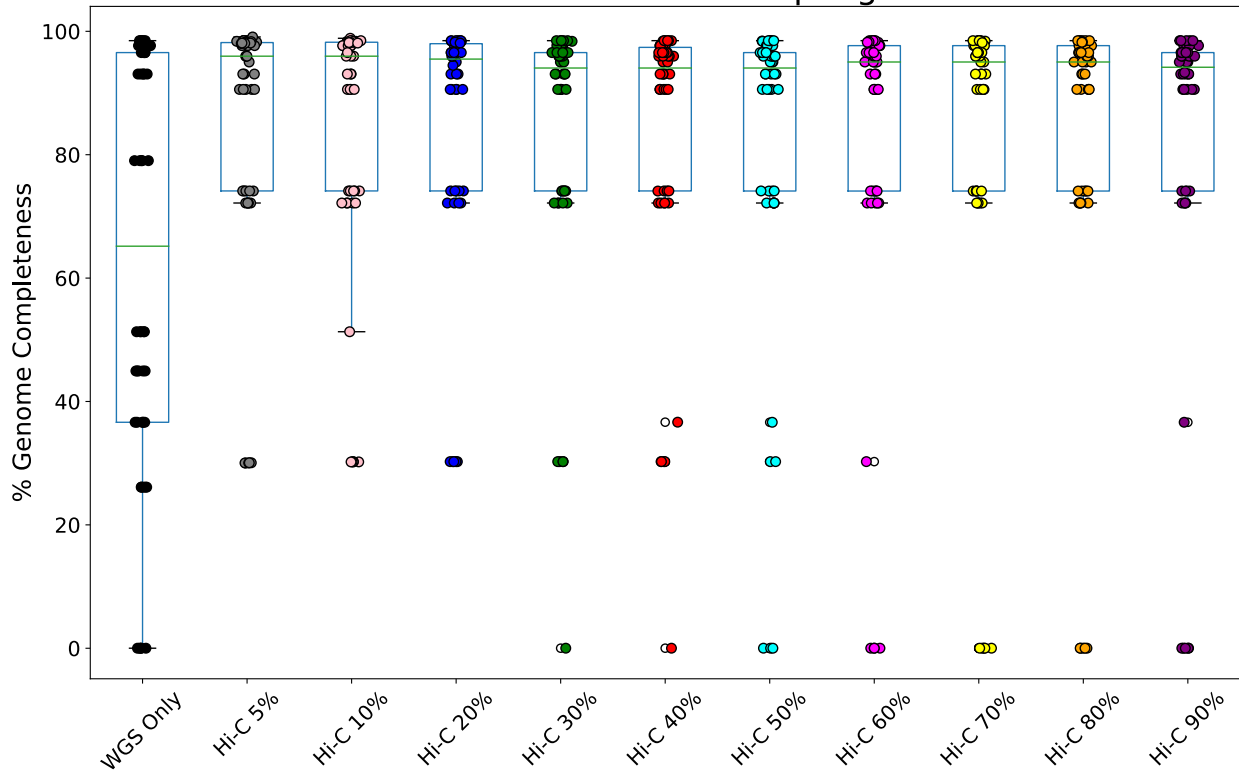

# Figure S5

Genome completeness of Synthetic dataset using different Hi-C sequencing kits and laboratory protocols

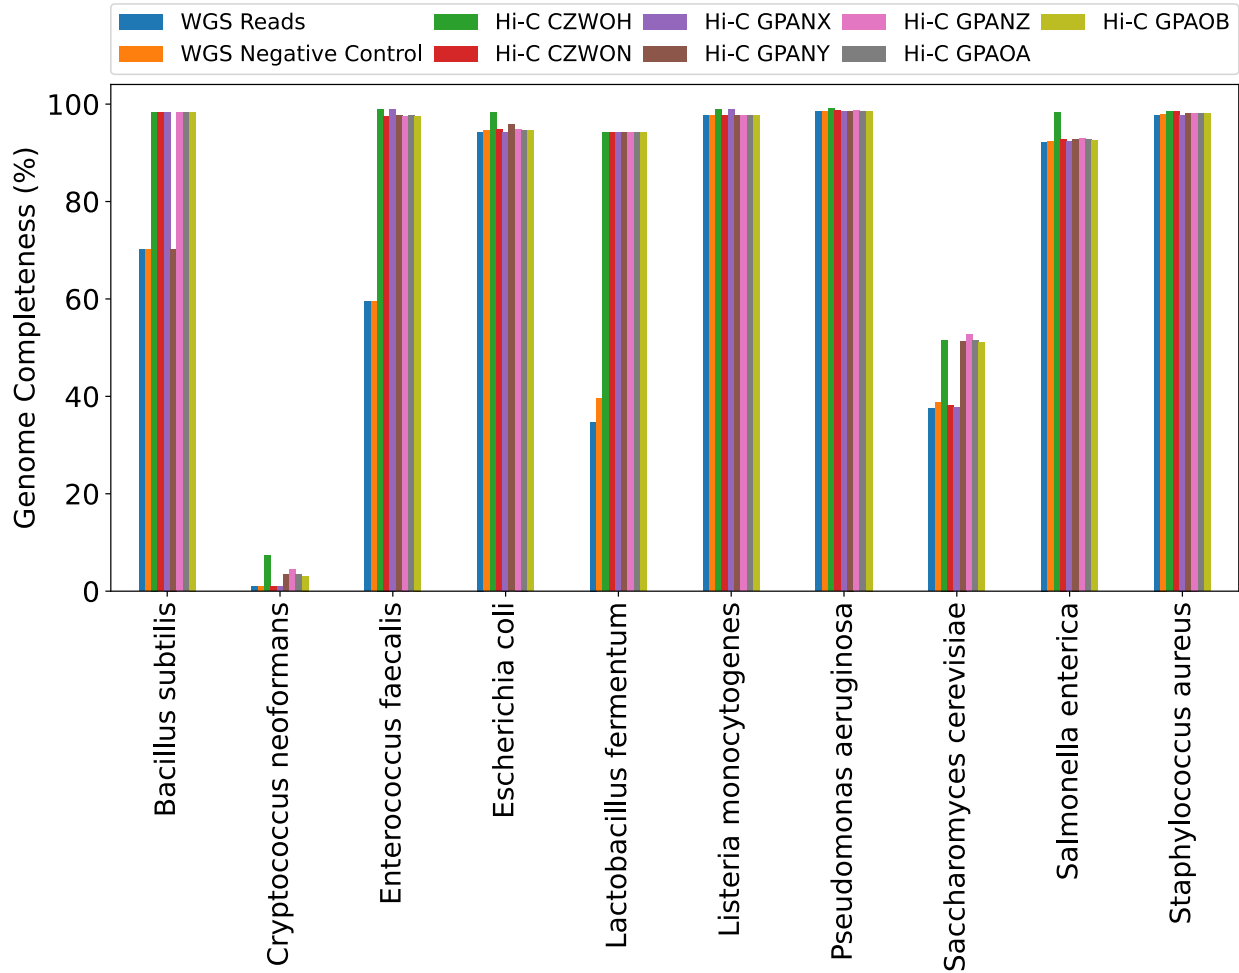

# Figure S6

The following graphs shows the increase in genome completeness and contamination as the number of bins used for training increased in metaBAT-LR

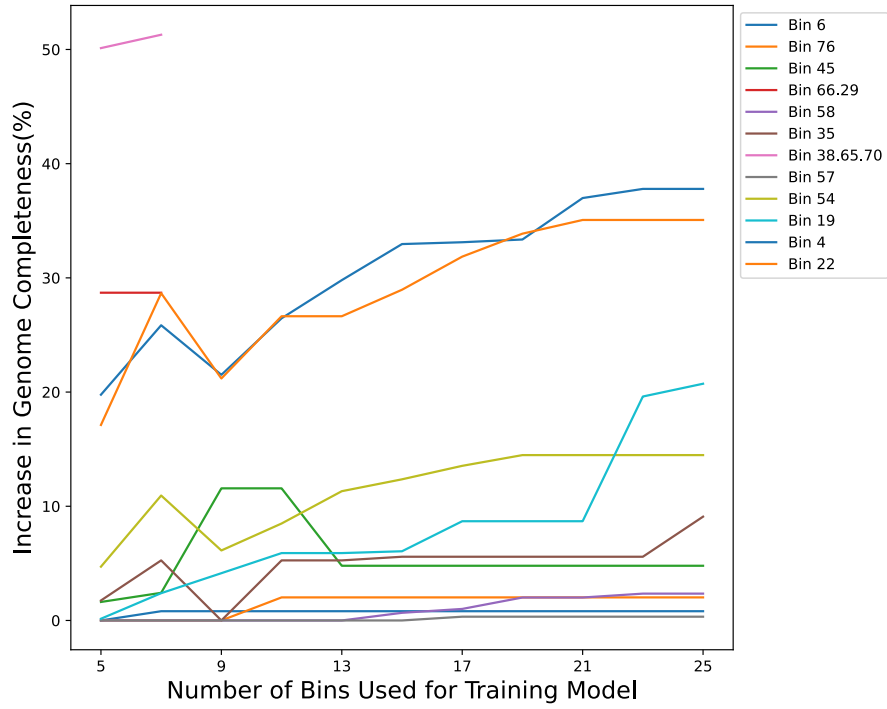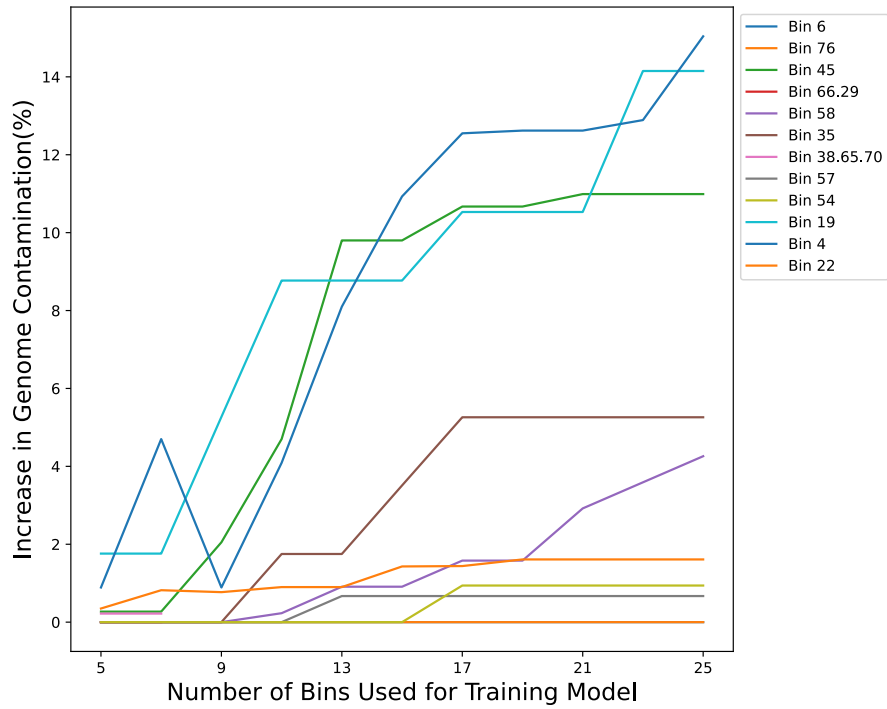

## Figure S7

AMBER Metrics per Bin for Binning Results of MetaBAT-LR, Bin3C, ProxiMeta, BinSPreader, and HicSPAdes

| Method      | Most abundant genome     | Purity (bp) | Completeness (bp) | Bin size (bp) | True positives (bp) | True size of most abundant genome (bp) |
|-------------|--------------------------|-------------|-------------------|---------------|---------------------|----------------------------------------|
| Metabat-LR  | Cryptococcus_neoformans  | 0.614083    | 0.993729218       | 26908340      | 16523956            | 16628228                               |
| Metabat-LR  | Pseudomonas_aeruginosa   | 1           | 0.992840772       | 6689917       | 6689917             | 6738157                                |
| Metabat-LR  | Bacillus_subtilis        | 1           | 0.973731652       | 3845203       | 3845203             | 3948935                                |
| Metabat-LR  | Salmonella_enterica      | 1           | 0.959432452       | 3801635       | 3801635             | 3962379                                |
| Metabat-LR  | Listeria_monocytogenes   | 1           | 0.955797301       | 2923826       | 2923826             | 3059044                                |
| Metabat-LR  | Staphylococcus_aureus    | 1           | 0.952857201       | 2636614       | 2636614             | 2767061                                |
| Metabat-LR  | Escherichia_coli         | 0.976899    | 0.952648595       | 5353282       | 5229614             | 5489552                                |
| Metabat-LR  | Enterococcus_faecalis    | 1           | 0.933150449       | 2577732       | 2577732             | 2762397                                |
| Metabat-LR  | Lactobacillus_fermentum  | 1           | 0.766190951       | 1375135       | 1375135             | 1794768                                |
| Bin3C       | Enterococcus_faecalis    | 1           | 0.241639243       | 471768        | 471768              | 1952365                                |
| Bin3C       | Bacillus_subtilis        | 1           | 0.235613438       | 1018420       | 1018420             | 4322419                                |
| Bin3C       | Enterococcus_faecalis    | 1           | 0.13480676        | 263192        | 263192              | 1952365                                |
| Bin3C       | Escherichia_coli         | 1           | 0.122800875       | 328637        | 328637              | 2676178                                |
| Bin3C       | Enterococcus_faecalis    | 1           | 0.091916214       | 179454        | 179454              | 1952365                                |
| ProxiMeta   | Lactobacillus_fermentum  | 1           | 0.873480603       | 1784375       | 1784375             | 2042833                                |
| ProxiMeta   | Enterococcus_faecalis    | 1           | 0.843231533       | 2814066       | 2814066             | 3337240                                |
| ProxiMeta   | Escherichia_coli         | 1           | 0.726853448       | 4419990       | 4419990             | 6080992                                |
| ProxiMeta   | Bacillus_subtilis        | 1           | 0.50339061        | 3975773       | 3975773             | 7897988                                |
| ProxiMeta   | Bacillus_subtilis        | 1           | 0.267943684       | 2116216       | 2116216             | 7897988                                |
| ProxiMeta   | Saccharomyces_cerevisiae | 1           | 0.201275392       | 2200756       | 2200756             | 10934054                               |
| BinSPreader | Pseudomonas_aeruginosa   | 0.943307    | 0.999935155       | 7160065       | 6754139             | 6754577                                |
| BinSPreader | Escherichia_coli         | 0.927832    | 0.999804336       | 5931306       | 5503254             | 5504331                                |
| BinSPreader | Staphylococcus_aureus    | 0.950192    | 0.995406724       | 2832163       | 2691099             | 2703517                                |
| BinSPreader | Salmonella_enterica      | 0.994483    | 0.969410795       | 3840621       | 3819432             | 3939952                                |
| BinSPreader | Listeria_monocytogenes   | 0.996269    | 0.960242867       | 2941521       | 2930546             | 3051880                                |
| BinSPreader | Enterococcus_faecalis    | 0.980731    | 0.526703106       | 1494751       | 1465948             | 2783253                                |
| BinSPreader | Bacillus_subtilis        | 0.999702    | 0.474988175       | 1894548       | 1893984             | 3987434                                |
| BinSPreader | Saccharomyces_cerevisiae | 0.999599    | 0.466353704       | 5031688       | 5029669             | 10785095                               |
| BinSPreader | Enterococcus_faecalis    | 0.999779    | 0.408737186       | 1137870       | 1137619             | 2783253                                |
| BinSPreader | Lactobacillus_fermentum  | 0.999518    | 0.334857753       | 606048        | 605756              | 1808995                                |

|             |                          |          |             |         |         |          |
|-------------|--------------------------|----------|-------------|---------|---------|----------|
| BinSPreader | Bacillus_subtilis        | 1        | 0.28635057  | 1141804 | 1141804 | 3987434  |
| BinSPreader | Lactobacillus_fermentum  | 0.992778 | 0.249168737 | 454024  | 450745  | 1808995  |
| BinSPreader | Bacillus_subtilis        | 0.97707  | 0.22361298  | 912567  | 891642  | 3987434  |
| BinSPreader | Lactobacillus_fermentum  | 1        | 0.194730223 | 352266  | 352266  | 1808995  |
| BinSPreader | Lactobacillus_fermentum  | 1        | 0.158831838 | 287326  | 287326  | 1808995  |
| HicSPAdes   | Enterococcus_faecalis    | 1        | 0.977263906 | 2812330 | 2812330 | 2877759  |
| HicSPAdes   | Lactobacillus_fermentum  | 0.559051 | 0.970770699 | 3139131 | 1754935 | 1807775  |
| HicSPAdes   | Bacillus_subtilis        | 0.918259 | 0.722286837 | 4329686 | 3975773 | 5504424  |
| HicSPAdes   | Listeria_monocytogenes   | 1        | 0.69644852  | 2923826 | 2923826 | 4198194  |
| HicSPAdes   | Staphylococcus_aureus    | 1        | 0.685021292 | 2682666 | 2682666 | 3916179  |
| HicSPAdes   | Escherichia_coli         | 1        | 0.364142836 | 2159225 | 2159225 | 5929610  |
| HicSPAdes   | Salmonella_enterica      | 1        | 0.284700371 | 1090801 | 1090801 | 3831400  |
| HicSPAdes   | Escherichia_coli         | 1        | 0.25641366  | 1520433 | 1520433 | 5929610  |
| HicSPAdes   | Bacillus_subtilis        | 1        | 0.175765711 | 967489  | 967489  | 5504424  |
| HicSPAdes   | Escherichia_coli         | 1        | 0.130360175 | 772985  | 772985  | 5929610  |
| HicSPAdes   | Listeria_monocytogenes   | 1        | 0.115670691 | 485608  | 485608  | 4198194  |
| HicSPAdes   | Salmonella_enterica      | 1        | 0.103257034 | 395619  | 395619  | 3831400  |
| HicSPAdes   | Salmonella_enterica      | 1        | 0.084767448 | 324778  | 324778  | 3831400  |
| HicSPAdes   | Salmonella_enterica      | 0.551149 | 0.058441823 | 406268  | 223914  | 3831400  |
| HicSPAdes   | Salmonella_enterica      | 1        | 0.035684606 | 136722  | 136722  | 3831400  |
| HicSPAdes   | Escherichia_coli         | 1        | 0.035423915 | 210050  | 210050  | 5929610  |
| HicSPAdes   | Escherichia_coli         | 1        | 0.033652972 | 199549  | 199549  | 5929610  |
| HicSPAdes   | Salmonella_enterica      | 1        | 0.029753354 | 113997  | 113997  | 3831400  |
| HicSPAdes   | Salmonella_enterica      | 1        | 0.025604479 | 98101   | 98101   | 3831400  |
| HicSPAdes   | Escherichia_coli         | 1        | 0.021039664 | 124757  | 124757  | 5929610  |
| HicSPAdes   | Salmonella_enterica      | 1        | 0.016467871 | 63095   | 63095   | 3831400  |
| HicSPAdes   | Escherichia_coli         | 1        | 0.015066084 | 89336   | 89336   | 5929610  |
| HicSPAdes   | Escherichia_coli         | 1        | 0.006366186 | 37749   | 37749   | 5929610  |
| HicSPAdes   | Lactobacillus_fermentum  | 1        | 0.00622312  | 11250   | 11250   | 1807775  |
| HicSPAdes   | Cryptococcus_neoformans  | 1        | 0.004270272 | 71191   | 71191   | 16671302 |
| HicSPAdes   | Salmonella_enterica      | 1        | 0.003817143 | 14625   | 14625   | 3831400  |
| HicSPAdes   | Saccharomyces_cerevisiae | 1        | 0.001999476 | 21760   | 21760   | 10882850 |
| HicSPAdes   | Escherichia_coli         | 1        | 0.001699775 | 10079   | 10079   | 5929610  |
| HicSPAdes   | Saccharomyces_cerevisiae | 1        | 0.001620439 | 17635   | 17635   | 10882850 |
| HicSPAdes   | Saccharomyces_cerevisiae | 1        | 0.001351576 | 14709   | 14709   | 10882850 |
| HicSPAdes   | Saccharomyces_cerevisiae | 1        | 0.001271266 | 13835   | 13835   | 10882850 |
| HicSPAdes   | Saccharomyces_cerevisiae | 1        | 0.000916672 | 9976    | 9976    | 10882850 |
| HicSPAdes   | Saccharomyces_cerevisiae | 1        | 0.000756695 | 8235    | 8235    | 10882850 |
| HicSPAdes   | Saccharomyces_cerevisiae | 1        | 0.000748885 | 8150    | 8150    | 10882850 |
| HicSPAdes   | Saccharomyces_cerevisiae | 1        | 0.000744566 | 8103    | 8103    | 10882850 |

|           |                          |   |             |      |      |          |
|-----------|--------------------------|---|-------------|------|------|----------|
| HicSPAdes | Saccharomyces_cerevisiae | 1 | 0.000741258 | 8067 | 8067 | 10882850 |
| HicSPAdes | Saccharomyces_cerevisiae | 1 | 0.000710016 | 7727 | 7727 | 10882850 |
| HicSPAdes | Saccharomyces_cerevisiae | 1 | 0.000651392 | 7089 | 7089 | 10882850 |
| HicSPAdes | Saccharomyces_cerevisiae | 1 | 0.00062309  | 6781 | 6781 | 10882850 |
| HicSPAdes | Saccharomyces_cerevisiae | 1 | 0.000621436 | 6763 | 6763 | 10882850 |
| HicSPAdes | Saccharomyces_cerevisiae | 1 | 0.000620977 | 6758 | 6758 | 10882850 |
| HicSPAdes | Saccharomyces_cerevisiae | 1 | 0.000594789 | 6473 | 6473 | 10882850 |
| HicSPAdes | Saccharomyces_cerevisiae | 1 | 0.000588357 | 6403 | 6403 | 10882850 |
| HicSPAdes | Cryptococcus_neoformans  | 1 | 0.000571881 | 9534 | 9534 | 16671302 |
| HicSPAdes | Saccharomyces_cerevisiae | 1 | 0.000525322 | 5717 | 5717 | 10882850 |
| HicSPAdes | Saccharomyces_cerevisiae | 1 | 0.000507863 | 5527 | 5527 | 10882850 |
| HicSPAdes | Saccharomyces_cerevisiae | 1 | 0.000498675 | 5427 | 5427 | 10882850 |
| HicSPAdes | Saccharomyces_cerevisiae | 1 | 0.000447677 | 4872 | 4872 | 10882850 |
| HicSPAdes | Cryptococcus_neoformans  | 1 | 0.00028816  | 4804 | 4804 | 16671302 |

## Figure S8

AMBER generated plots for binning results of MetaBAT-LR, Bin3C, ProxiMeta, BinSPreader, HicSPAdes, and Metabat2 with no Hi-C reads

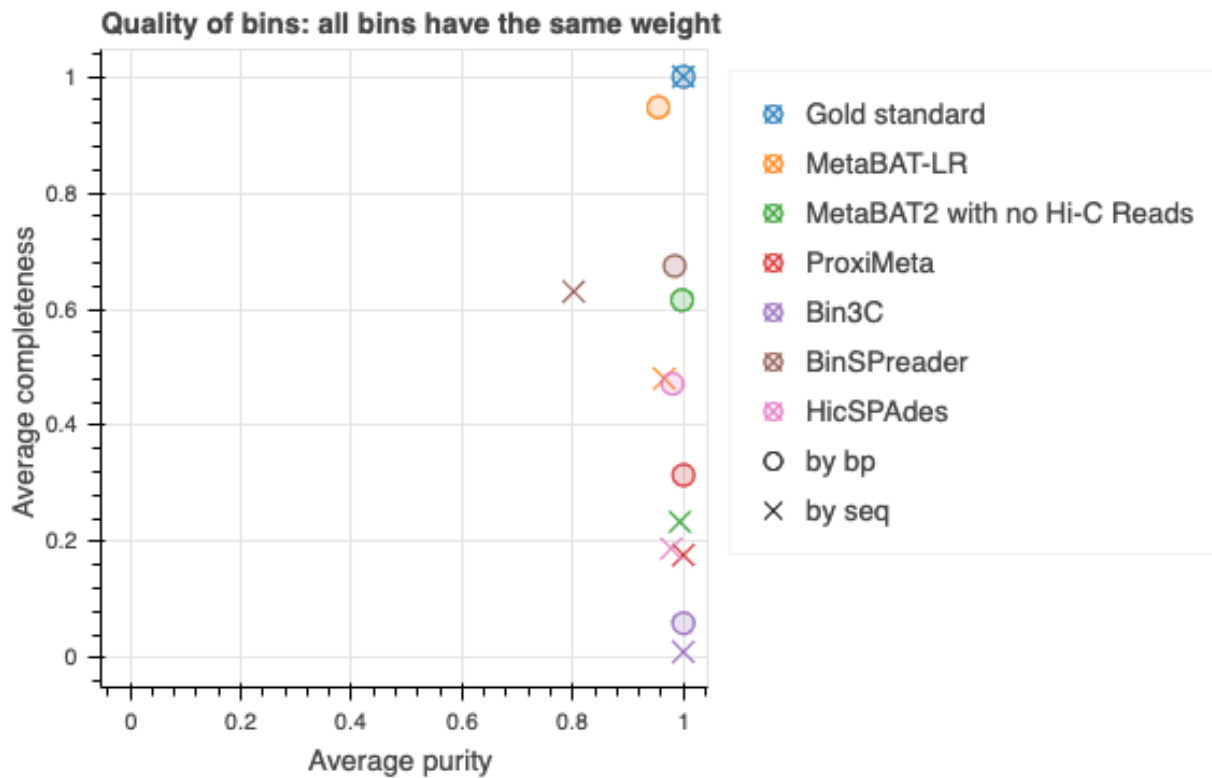



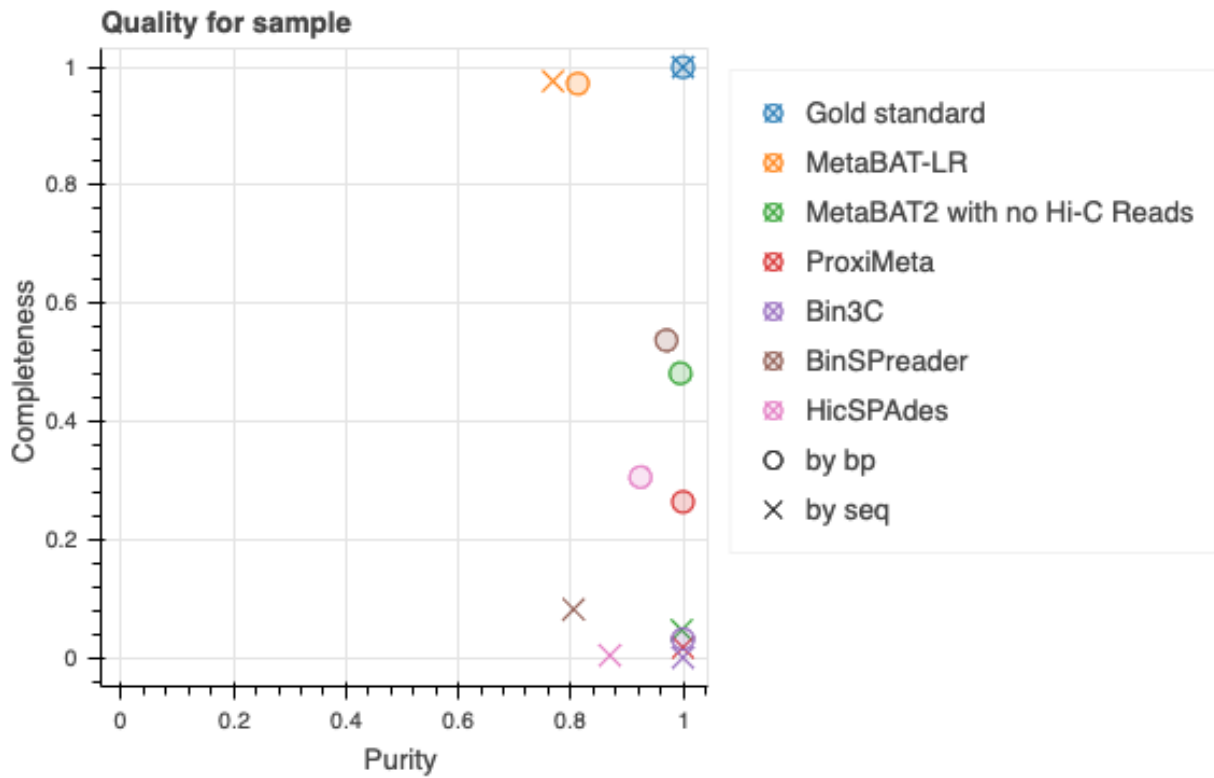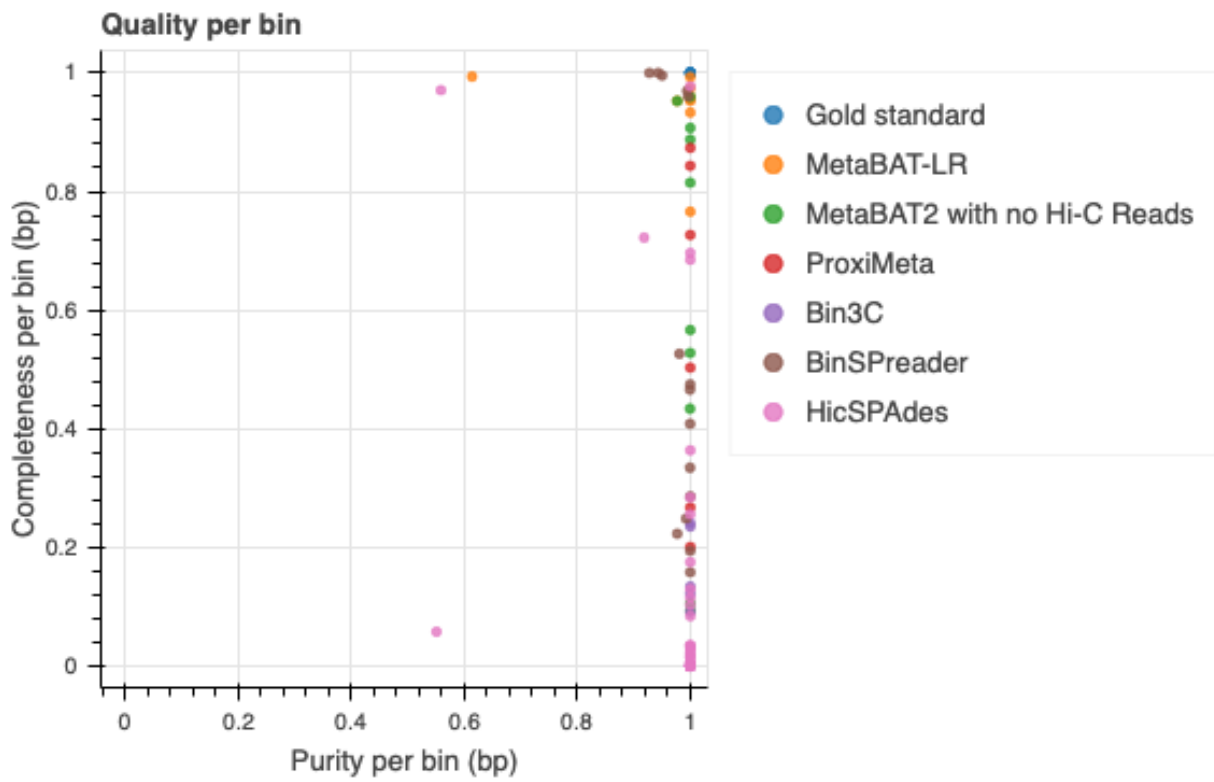

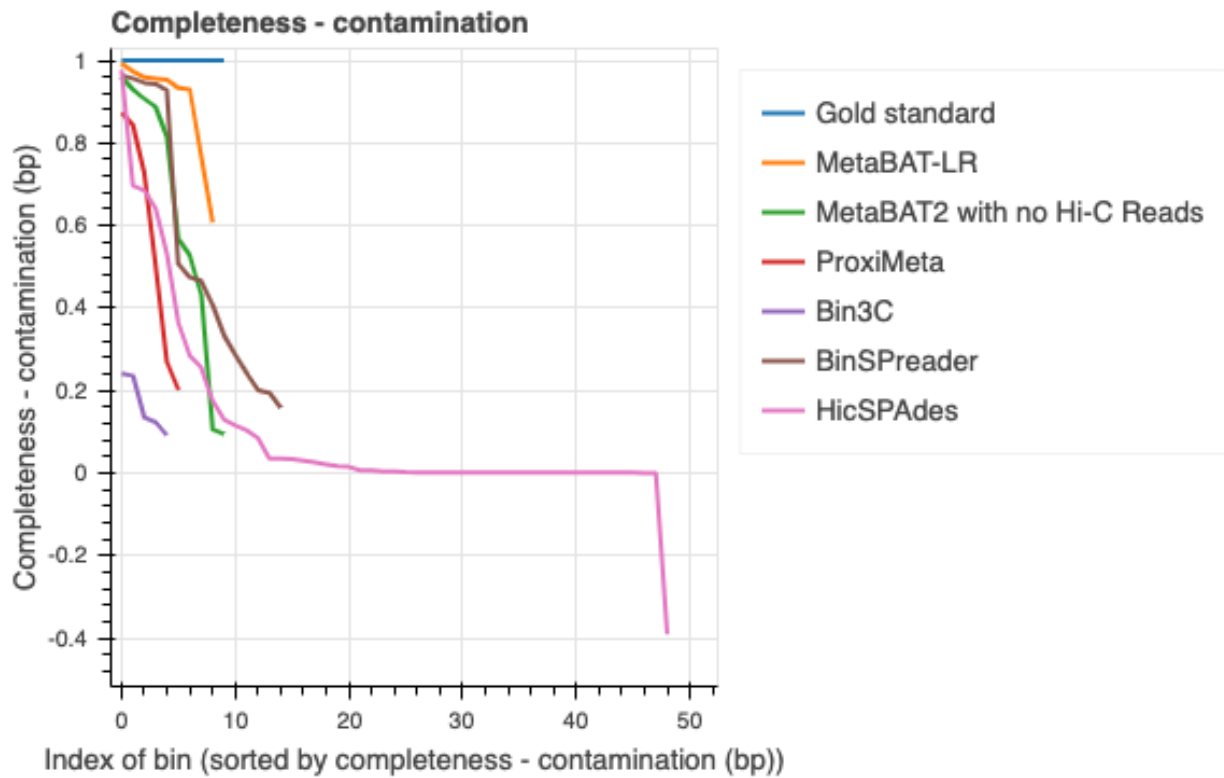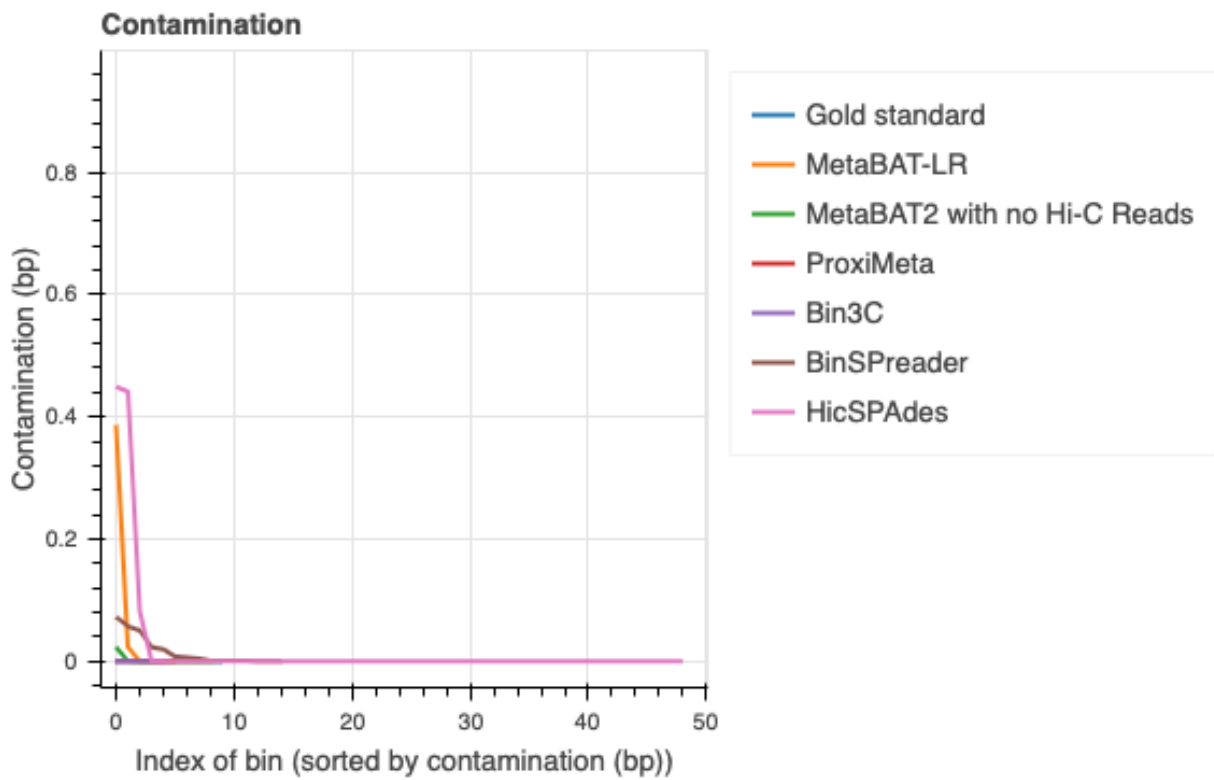

## Figure S9

Metabat-LR Unique Bins from Human Fecal Dataset

| Completeness | Contamination | Bin ID    | Marker Lineage              |
|--------------|---------------|-----------|-----------------------------|
| 96.31        | 0.00          | Bin.15.fa | o Bacteroidales (UID2654)   |
| 89.13        | 4.52          | Bin.49.fa | f Lachnospiraceae (UID1256) |

## Figure S10

The following charts show the number of metagenome bins found by each method at varying genome completeness levels. All bins are of medium quality or higher (having genome completeness of greater than or equal to 50% and contamination levels lower than 10%)

AMBER Output Comparing Completeness for the Zymo Mock Synthetic Dataset

| Method      | Completeness |         |         |         |      |
|-------------|--------------|---------|---------|---------|------|
|             | 50%-60%      | 60%-70% | 70%-80% | 80%-90% | >90% |
| MetaBAT-LR  | 0            | 0       | 1       | 0       | 7    |
| ProxiMeta   | 1            | 0       | 1       | 2       | 0    |
| BinSPreader | 1            | 0       | 0       | 0       | 5    |
| Bin3C       | 0            | 0       | 0       | 0       | 0    |
| HicSPAdes   | 0            | 2       | 1       | 0       | 1    |

dRep Output Comparing Completeness for Cat Fecal Dataset

| Method      | Completeness |         |         |         |      |
|-------------|--------------|---------|---------|---------|------|
|             | 50%-60%      | 60%-70% | 70%-80% | 80%-90% | >90% |
| MetaBAT-LR  | 2            | 3       | 5       | 7       | 26   |
| ProxiMeta   | 1            | 1       | 7       | 4       | 28   |
| BinSPreader | 3            | 4       | 5       | 4       | 18   |
| Bin3C       | 1            | 3       | 4       | 5       | 23   |
| HicSPAdes   | 2            | 2       | 3       | 2       | 21   |

dRep Output Comparing Completeness for Human Fecal Dataset

| Method      | Completeness |         |         |         |      |
|-------------|--------------|---------|---------|---------|------|
|             | 50%-60%      | 60%-70% | 70%-80% | 80%-90% | >90% |
| MetaBAT-LR  | 2            | 2       | 5       | 5       | 23   |
| ProxiMeta   | 7            | 0       | 5       | 3       | 27   |
| BinSPreader | 3            | 2       | 4       | 3       | 14   |
| Bin3C       | 1            | 1       | 3       | 1       | 28   |
| HicSPAdes   | 2            | 2       | 3       | 2       | 19   |
